# Supplementary material for: Evaluation of Machine Learning Based QSAR Models for the Classification of Lung Surfactant Inhibitors
Source: PubMed Central journal article supplement — Environ Health (Wash). 2024 Sep 20;2(12):912–7. doi: 10.1021/envhealth.4c00118 (PMC11667287; doi:10.1021/envhealth.4c00118), 2024-09-20
Supplement: eh4c00118_si_001.pdf [file eh4c00118_si_001.pdf]

# Supporting information

## Manuscript title

Evaluation of Machine Learning Based QSAR Models for the Classification of Lung Surfactant Inhibitors

## Authors

James Y. Liu<sup>1</sup>, Joshua Peeples<sup>2</sup>, Christie M. Sayes<sup>1\*</sup>

## Affiliations

<sup>1</sup> Department of Environmental Science, Baylor University, Waco, TX 76798-7266, USA

<sup>2</sup> Department of Electrical & Computer Engineering, Texas A&M University, College Station, TX 77845, USA

## Corresponding Author's Email Address

Christie Sayes; Department of Environmental Science, Baylor University, One Bear Place #97266, Waco, TX 76798-7266, USA. Email: [Christie\\_sayes@baylor.edu](mailto:Christie_sayes@baylor.edu)

**Table S1.** Full results for all models.

| Model | Par1            | Par2  | Par3 | acc  | sd   | pre  | sd   | rec  | sd   | f1s  | sd   | Time | Data |
|-------|-----------------|-------|------|------|------|------|------|------|------|------|------|------|------|
| LR    | lbfgs           | 0.10  | 0.00 | 0.72 | 0.17 | 0.74 | 0.22 | 0.82 | 0.18 | 0.75 | 0.18 | 0.4  | S    |
| LR    | lbfgs           | 1.00  | 0.00 | 0.72 | 0.17 | 0.73 | 0.22 | 0.81 | 0.20 | 0.75 | 0.19 | 0.6  | S    |
| LR    | lbfgs           | 10.00 | 0.00 | 0.66 | 0.18 | 0.68 | 0.23 | 0.77 | 0.21 | 0.70 | 0.20 | 0.8  | S    |
| LR    | liblinear       | 0.10  | 0.00 | 0.71 | 0.16 | 0.72 | 0.21 | 0.82 | 0.18 | 0.74 | 0.17 | 0.3  | S    |
| LR    | liblinear       | 1.00  | 0.00 | 0.72 | 0.17 | 0.73 | 0.23 | 0.81 | 0.20 | 0.74 | 0.19 | 0.3  | S    |
| LR    | liblinear       | 10.00 | 0.00 | 0.67 | 0.17 | 0.68 | 0.22 | 0.78 | 0.20 | 0.70 | 0.19 | 0.3  | S    |
| LR    | newton-cg       | 0.10  | 0.00 | 0.72 | 0.17 | 0.73 | 0.22 | 0.82 | 0.18 | 0.75 | 0.18 | 0.4  | S    |
| LR    | newton-cg       | 1.00  | 0.00 | 0.72 | 0.17 | 0.73 | 0.22 | 0.81 | 0.20 | 0.75 | 0.19 | 0.5  | S    |
| LR    | newton-cg       | 10.00 | 0.00 | 0.66 | 0.18 | 0.68 | 0.23 | 0.77 | 0.21 | 0.70 | 0.20 | 0.6  | S    |
| LR    | newton-cholesky | 0.10  | 0.00 | 0.72 | 0.17 | 0.73 | 0.22 | 0.82 | 0.18 | 0.75 | 0.18 | 1.9  | S    |
| LR    | newton-cholesky | 1.00  | 0.00 | 0.72 | 0.17 | 0.73 | 0.22 | 0.81 | 0.20 | 0.75 | 0.19 | 2.2  | S    |
| LR    | newton-cholesky | 10.00 | 0.00 | 0.66 | 0.17 | 0.68 | 0.23 | 0.77 | 0.21 | 0.70 | 0.19 | 2.7  | S    |
| LR    | lbfgs           | 0.10  | 0.00 | 0.75 | 0.15 | 0.77 | 0.21 | 0.77 | 0.20 | 0.75 | 0.18 | 1.7  | SO   |
| LR    | lbfgs           | 1.00  | 0.00 | 0.74 | 0.15 | 0.75 | 0.23 | 0.78 | 0.21 | 0.75 | 0.19 | 1.8  | SO   |
| LR    | lbfgs           | 10.00 | 0.00 | 0.67 | 0.17 | 0.69 | 0.22 | 0.77 | 0.21 | 0.70 | 0.19 | 2.0  | SO   |
| LR    | liblinear       | 0.10  | 0.00 | 0.75 | 0.15 | 0.78 | 0.20 | 0.78 | 0.19 | 0.76 | 0.17 | 1.6  | SO   |
| LR    | liblinear       | 1.00  | 0.00 | 0.73 | 0.14 | 0.74 | 0.22 | 0.78 | 0.21 | 0.74 | 0.19 | 1.7  | SO   |

|    |                 |       |      |      |      |      |      |      |      |      |      |      |     |
|----|-----------------|-------|------|------|------|------|------|------|------|------|------|------|-----|
| LR | liblinear       | 10.00 | 0.00 | 0.68 | 0.16 | 0.69 | 0.22 | 0.78 | 0.20 | 0.71 | 0.18 | 1.6  | SO  |
| LR | newton-cg       | 0.10  | 0.00 | 0.75 | 0.15 | 0.77 | 0.21 | 0.77 | 0.20 | 0.75 | 0.18 | 1.6  | SO  |
| LR | newton-cg       | 1.00  | 0.00 | 0.74 | 0.15 | 0.75 | 0.23 | 0.78 | 0.21 | 0.75 | 0.19 | 1.6  | SO  |
| LR | newton-cg       | 10.00 | 0.00 | 0.67 | 0.17 | 0.68 | 0.23 | 0.77 | 0.21 | 0.70 | 0.19 | 1.7  | SO  |
| LR | newton-cholesky | 0.10  | 0.00 | 0.75 | 0.15 | 0.77 | 0.21 | 0.77 | 0.20 | 0.75 | 0.18 | 3.3  | SO  |
| LR | newton-cholesky | 1.00  | 0.00 | 0.74 | 0.15 | 0.75 | 0.23 | 0.78 | 0.21 | 0.75 | 0.19 | 3.7  | SO  |
| LR | newton-cholesky | 10.00 | 0.00 | 0.67 | 0.17 | 0.69 | 0.22 | 0.77 | 0.21 | 0.70 | 0.19 | 4.7  | SO  |
| LR | lbfgs           | 0.10  | 0.00 | 0.72 | 0.18 | 0.74 | 0.22 | 0.81 | 0.18 | 0.75 | 0.18 | 0.6  | IS  |
| LR | lbfgs           | 1.00  | 0.00 | 0.72 | 0.16 | 0.75 | 0.22 | 0.80 | 0.17 | 0.74 | 0.17 | 0.6  | IS  |
| LR | lbfgs           | 10.00 | 0.00 | 0.70 | 0.16 | 0.73 | 0.22 | 0.75 | 0.19 | 0.71 | 0.18 | 0.8  | IS  |
| LR | liblinear       | 0.10  | 0.00 | 0.72 | 0.18 | 0.74 | 0.22 | 0.81 | 0.18 | 0.75 | 0.18 | 0.3  | IS  |
| LR | liblinear       | 1.00  | 0.00 | 0.72 | 0.16 | 0.75 | 0.22 | 0.80 | 0.17 | 0.74 | 0.17 | 0.4  | IS  |
| LR | liblinear       | 10.00 | 0.00 | 0.70 | 0.16 | 0.73 | 0.22 | 0.75 | 0.19 | 0.71 | 0.18 | 0.5  | IS  |
| LR | newton-cg       | 0.10  | 0.00 | 0.72 | 0.18 | 0.74 | 0.22 | 0.81 | 0.18 | 0.75 | 0.18 | 0.5  | IS  |
| LR | newton-cg       | 1.00  | 0.00 | 0.72 | 0.16 | 0.75 | 0.22 | 0.80 | 0.17 | 0.74 | 0.17 | 0.5  | IS  |
| LR | newton-cg       | 10.00 | 0.00 | 0.70 | 0.16 | 0.73 | 0.22 | 0.75 | 0.19 | 0.71 | 0.18 | 0.5  | IS  |
| LR | newton-cholesky | 0.10  | 0.00 | 0.72 | 0.18 | 0.74 | 0.22 | 0.81 | 0.18 | 0.75 | 0.18 | 9.3  | IS  |
| LR | newton-cholesky | 1.00  | 0.00 | 0.72 | 0.16 | 0.75 | 0.22 | 0.80 | 0.17 | 0.74 | 0.17 | 10.7 | IS  |
| LR | newton-cholesky | 10.00 | 0.00 | 0.70 | 0.16 | 0.73 | 0.22 | 0.75 | 0.19 | 0.71 | 0.18 | 13.9 | IS  |
| LR | lbfgs           | 0.10  | 0.00 | 0.75 | 0.15 | 0.77 | 0.20 | 0.81 | 0.18 | 0.77 | 0.16 | 1.9  | ISO |
| LR | lbfgs           | 1.00  | 0.00 | 0.73 | 0.15 | 0.76 | 0.23 | 0.77 | 0.20 | 0.74 | 0.18 | 1.8  | ISO |
| LR | lbfgs           | 10.00 | 0.00 | 0.70 | 0.15 | 0.74 | 0.23 | 0.74 | 0.19 | 0.72 | 0.18 | 1.9  | ISO |
| LR | liblinear       | 0.10  | 0.00 | 0.76 | 0.15 | 0.77 | 0.20 | 0.81 | 0.18 | 0.77 | 0.16 | 1.6  | ISO |
| LR | liblinear       | 1.00  | 0.00 | 0.72 | 0.16 | 0.75 | 0.23 | 0.77 | 0.20 | 0.73 | 0.18 | 1.7  | ISO |
| LR | liblinear       | 10.00 | 0.00 | 0.70 | 0.15 | 0.74 | 0.23 | 0.74 | 0.19 | 0.72 | 0.18 | 2.0  | ISO |
| LR | newton-cg       | 0.10  | 0.00 | 0.75 | 0.15 | 0.77 | 0.20 | 0.81 | 0.18 | 0.77 | 0.16 | 1.8  | ISO |
| LR | newton-cg       | 1.00  | 0.00 | 0.73 | 0.15 | 0.76 | 0.23 | 0.77 | 0.20 | 0.74 | 0.18 | 1.7  | ISO |
| LR | newton-cg       | 10.00 | 0.00 | 0.70 | 0.15 | 0.74 | 0.23 | 0.74 | 0.19 | 0.72 | 0.18 | 1.6  | ISO |
| LR | newton-cholesky | 0.10  | 0.00 | 0.75 | 0.15 | 0.77 | 0.20 | 0.81 | 0.18 | 0.77 | 0.16 | 10.5 | ISO |
| LR | newton-cholesky | 1.00  | 0.00 | 0.73 | 0.15 | 0.76 | 0.23 | 0.77 | 0.20 | 0.74 | 0.18 | 14.1 | ISO |
| LR | newton-cholesky | 10.00 | 0.00 | 0.70 | 0.15 | 0.74 | 0.23 | 0.74 | 0.19 | 0.72 | 0.18 | 16.3 | ISO |
| LR | lbfgs           | 0.10  | 0.00 | 0.67 | 0.14 | 0.74 | 0.23 | 0.67 | 0.20 | 0.68 | 0.16 | 1.4  | SR  |
| LR | lbfgs           | 1.00  | 0.00 | 0.68 | 0.15 | 0.74 | 0.23 | 0.67 | 0.22 | 0.67 | 0.19 | 1.5  | SR  |
| LR | lbfgs           | 10.00 | 0.00 | 0.68 | 0.15 | 0.73 | 0.23 | 0.69 | 0.22 | 0.68 | 0.18 | 1.4  | SR  |
| LR | liblinear       | 0.10  | 0.00 | 0.48 | 0.17 | 0.48 | 0.29 | 0.72 | 0.39 | 0.52 | 0.28 | 0.3  | SR  |
| LR | liblinear       | 1.00  | 0.00 | 0.47 | 0.17 | 0.48 | 0.28 | 0.72 | 0.39 | 0.52 | 0.28 | 0.3  | SR  |
| LR | liblinear       | 10.00 | 0.00 | 0.48 | 0.17 | 0.48 | 0.29 | 0.72 | 0.39 | 0.52 | 0.28 | 0.3  | SR  |
| LR | newton-cg       | 0.10  | 0.00 | 0.63 | 0.17 | 0.68 | 0.23 | 0.68 | 0.24 | 0.65 | 0.20 | 7.5  | SR  |
| LR | newton-cg       | 1.00  | 0.00 | 0.63 | 0.17 | 0.68 | 0.23 | 0.68 | 0.23 | 0.65 | 0.20 | 7.5  | SR  |

|    |                 |       |      |      |      |      |      |      |      |      |      |     |      |
|----|-----------------|-------|------|------|------|------|------|------|------|------|------|-----|------|
| LR | newton-cg       | 10.00 | 0.00 | 0.62 | 0.17 | 0.67 | 0.23 | 0.66 | 0.23 | 0.63 | 0.19 | 7.2 | SR   |
| LR | newton-cholesky | 0.10  | 0.00 | 0.67 | 0.14 | 0.74 | 0.23 | 0.67 | 0.20 | 0.68 | 0.16 | 1.5 | SR   |
| LR | newton-cholesky | 1.00  | 0.00 | 0.68 | 0.15 | 0.74 | 0.23 | 0.67 | 0.22 | 0.67 | 0.19 | 1.6 | SR   |
| LR | newton-cholesky | 10.00 | 0.00 | 0.68 | 0.15 | 0.73 | 0.23 | 0.69 | 0.22 | 0.68 | 0.18 | 1.5 | SR   |
| LR | lbfgs           | 0.10  | 0.00 | 0.67 | 0.14 | 0.74 | 0.23 | 0.65 | 0.22 | 0.66 | 0.18 | 2.6 | SRO  |
| LR | lbfgs           | 1.00  | 0.00 | 0.69 | 0.13 | 0.77 | 0.22 | 0.67 | 0.20 | 0.68 | 0.16 | 2.6 | SRO  |
| LR | lbfgs           | 10.00 | 0.00 | 0.68 | 0.14 | 0.75 | 0.23 | 0.64 | 0.22 | 0.66 | 0.19 | 2.6 | SRO  |
| LR | liblinear       | 0.10  | 0.00 | 0.52 | 0.18 | 0.42 | 0.46 | 0.20 | 0.29 | 0.23 | 0.28 | 1.4 | SRO  |
| LR | liblinear       | 1.00  | 0.00 | 0.52 | 0.18 | 0.42 | 0.46 | 0.20 | 0.29 | 0.23 | 0.28 | 1.4 | SRO  |
| LR | liblinear       | 10.00 | 0.00 | 0.52 | 0.18 | 0.42 | 0.46 | 0.20 | 0.29 | 0.23 | 0.28 | 1.4 | SRO  |
| LR | newton-cg       | 0.10  | 0.00 | 0.62 | 0.18 | 0.67 | 0.23 | 0.66 | 0.24 | 0.63 | 0.20 | 8.7 | SRO  |
| LR | newton-cg       | 1.00  | 0.00 | 0.63 | 0.16 | 0.68 | 0.23 | 0.67 | 0.23 | 0.64 | 0.19 | 8.7 | SRO  |
| LR | newton-cg       | 10.00 | 0.00 | 0.63 | 0.16 | 0.68 | 0.22 | 0.66 | 0.23 | 0.64 | 0.19 | 8.4 | SRO  |
| LR | newton-cholesky | 0.10  | 0.00 | 0.67 | 0.14 | 0.74 | 0.23 | 0.65 | 0.22 | 0.66 | 0.18 | 3.0 | SRO  |
| LR | newton-cholesky | 1.00  | 0.00 | 0.69 | 0.13 | 0.77 | 0.22 | 0.67 | 0.20 | 0.68 | 0.16 | 2.9 | SRO  |
| LR | newton-cholesky | 10.00 | 0.00 | 0.68 | 0.14 | 0.75 | 0.23 | 0.64 | 0.22 | 0.66 | 0.19 | 3.0 | SRO  |
| LR | lbfgs           | 0.10  | 0.00 | 0.72 | 0.18 | 0.74 | 0.22 | 0.81 | 0.18 | 0.75 | 0.18 | 0.3 | ISR  |
| LR | lbfgs           | 1.00  | 0.00 | 0.72 | 0.16 | 0.75 | 0.22 | 0.80 | 0.17 | 0.74 | 0.17 | 0.3 | ISR  |
| LR | lbfgs           | 10.00 | 0.00 | 0.69 | 0.17 | 0.73 | 0.23 | 0.74 | 0.20 | 0.71 | 0.18 | 0.4 | ISR  |
| LR | liblinear       | 0.10  | 0.00 | 0.78 | 0.14 | 0.80 | 0.20 | 0.77 | 0.21 | 0.77 | 0.18 | 0.2 | ISR  |
| LR | liblinear       | 1.00  | 0.00 | 0.73 | 0.16 | 0.76 | 0.23 | 0.75 | 0.21 | 0.73 | 0.19 | 0.2 | ISR  |
| LR | liblinear       | 10.00 | 0.00 | 0.71 | 0.16 | 0.74 | 0.23 | 0.73 | 0.20 | 0.71 | 0.19 | 0.2 | ISR  |
| LR | newton-cg       | 0.10  | 0.00 | 0.72 | 0.18 | 0.74 | 0.22 | 0.81 | 0.18 | 0.75 | 0.18 | 0.3 | ISR  |
| LR | newton-cg       | 1.00  | 0.00 | 0.72 | 0.16 | 0.75 | 0.22 | 0.80 | 0.17 | 0.74 | 0.17 | 0.3 | ISR  |
| LR | newton-cg       | 10.00 | 0.00 | 0.69 | 0.17 | 0.73 | 0.23 | 0.74 | 0.20 | 0.71 | 0.19 | 0.4 | ISR  |
| LR | newton-cholesky | 0.10  | 0.00 | 0.72 | 0.18 | 0.74 | 0.22 | 0.81 | 0.18 | 0.75 | 0.18 | 0.3 | ISR  |
| LR | newton-cholesky | 1.00  | 0.00 | 0.72 | 0.16 | 0.75 | 0.22 | 0.80 | 0.17 | 0.74 | 0.17 | 0.3 | ISR  |
| LR | newton-cholesky | 10.00 | 0.00 | 0.70 | 0.16 | 0.73 | 0.22 | 0.75 | 0.19 | 0.71 | 0.18 | 0.3 | ISR  |
| LR | lbfgs           | 0.10  | 0.00 | 0.75 | 0.15 | 0.77 | 0.20 | 0.81 | 0.18 | 0.77 | 0.16 | 1.5 | ISRO |
| LR | lbfgs           | 1.00  | 0.00 | 0.73 | 0.15 | 0.76 | 0.23 | 0.77 | 0.20 | 0.74 | 0.18 | 1.5 | ISRO |
| LR | lbfgs           | 10.00 | 0.00 | 0.70 | 0.16 | 0.74 | 0.23 | 0.74 | 0.20 | 0.71 | 0.18 | 1.5 | ISRO |
| LR | liblinear       | 0.10  | 0.00 | 0.78 | 0.15 | 0.80 | 0.20 | 0.76 | 0.22 | 0.77 | 0.19 | 1.4 | ISRO |
| LR | liblinear       | 1.00  | 0.00 | 0.73 | 0.16 | 0.76 | 0.23 | 0.73 | 0.20 | 0.73 | 0.18 | 1.4 | ISRO |
| LR | liblinear       | 10.00 | 0.00 | 0.71 | 0.16 | 0.75 | 0.24 | 0.73 | 0.20 | 0.71 | 0.19 | 1.4 | ISRO |
| LR | newton-cg       | 0.10  | 0.00 | 0.75 | 0.14 | 0.76 | 0.20 | 0.80 | 0.18 | 0.76 | 0.16 | 1.5 | ISRO |
| LR | newton-cg       | 1.00  | 0.00 | 0.73 | 0.15 | 0.76 | 0.23 | 0.77 | 0.20 | 0.74 | 0.18 | 1.6 | ISRO |
| LR | newton-cg       | 10.00 | 0.00 | 0.70 | 0.15 | 0.74 | 0.23 | 0.74 | 0.19 | 0.72 | 0.18 | 1.5 | ISRO |
| LR | newton-cholesky | 0.10  | 0.00 | 0.75 | 0.15 | 0.77 | 0.20 | 0.81 | 0.18 | 0.77 | 0.16 | 1.7 | ISRO |

|     |                 |       |      |      |      |      |      |      |      |      |      |     |      |
|-----|-----------------|-------|------|------|------|------|------|------|------|------|------|-----|------|
| LR  | newton-cholesky | 1.00  | 0.00 | 0.73 | 0.15 | 0.76 | 0.23 | 0.77 | 0.20 | 0.74 | 0.18 | 1.7 | ISRO |
| LR  | newton-cholesky | 10.00 | 0.00 | 0.70 | 0.15 | 0.74 | 0.23 | 0.74 | 0.19 | 0.72 | 0.18 | 1.7 | ISRO |
| SVM | linear          | 0.10  | 0.00 | 0.78 | 0.14 | 0.81 | 0.22 | 0.77 | 0.22 | 0.77 | 0.19 | 0.3 | S    |
| SVM | linear          | 1.00  | 0.00 | 0.65 | 0.16 | 0.67 | 0.23 | 0.76 | 0.21 | 0.68 | 0.19 | 0.3 | S    |
| SVM | linear          | 10.00 | 0.00 | 0.64 | 0.17 | 0.66 | 0.23 | 0.75 | 0.21 | 0.68 | 0.19 | 0.3 | S    |
| SVM | poly            | 0.10  | 0.00 | 0.52 | 0.20 | 0.63 | 0.28 | 0.71 | 0.32 | 0.57 | 0.22 | 0.3 | S    |
| SVM | poly            | 1.00  | 0.00 | 0.72 | 0.15 | 0.81 | 0.24 | 0.65 | 0.23 | 0.70 | 0.20 | 0.3 | S    |
| SVM | poly            | 10.00 | 0.00 | 0.67 | 0.16 | 0.73 | 0.25 | 0.70 | 0.20 | 0.68 | 0.19 | 0.3 | S    |
| SVM | rbf             | 0.10  | 0.00 | 0.53 | 0.18 | 0.53 | 0.20 | 0.94 | 0.21 | 0.66 | 0.20 | 0.4 | S    |
| SVM | rbf             | 1.00  | 0.00 | 0.70 | 0.19 | 0.73 | 0.23 | 0.79 | 0.20 | 0.72 | 0.19 | 0.4 | S    |
| SVM | rbf             | 10.00 | 0.00 | 0.72 | 0.15 | 0.75 | 0.23 | 0.77 | 0.21 | 0.73 | 0.19 | 0.4 | S    |
| SVM | sigmoid         | 0.10  | 0.00 | 0.51 | 0.17 | 0.54 | 0.21 | 0.93 | 0.24 | 0.64 | 0.20 | 0.3 | S    |
| SVM | sigmoid         | 1.00  | 0.00 | 0.51 | 0.16 | 0.56 | 0.19 | 0.93 | 0.21 | 0.65 | 0.17 | 0.3 | S    |
| SVM | sigmoid         | 10.00 | 0.00 | 0.69 | 0.15 | 0.69 | 0.20 | 0.82 | 0.18 | 0.72 | 0.16 | 0.3 | S    |
| SVM | linear          | 0.10  | 0.00 | 0.79 | 0.13 | 0.84 | 0.20 | 0.75 | 0.21 | 0.78 | 0.18 | 1.5 | SO   |
| SVM | linear          | 1.00  | 0.00 | 0.65 | 0.16 | 0.67 | 0.23 | 0.75 | 0.21 | 0.68 | 0.19 | 1.5 | SO   |
| SVM | linear          | 10.00 | 0.00 | 0.64 | 0.17 | 0.67 | 0.23 | 0.75 | 0.21 | 0.68 | 0.19 | 1.5 | SO   |
| SVM | poly            | 0.10  | 0.00 | 0.59 | 0.18 | 0.69 | 0.34 | 0.42 | 0.27 | 0.49 | 0.25 | 1.5 | SO   |
| SVM | poly            | 1.00  | 0.00 | 0.73 | 0.15 | 0.82 | 0.23 | 0.65 | 0.23 | 0.70 | 0.20 | 1.5 | SO   |
| SVM | poly            | 10.00 | 0.00 | 0.67 | 0.15 | 0.72 | 0.24 | 0.70 | 0.20 | 0.68 | 0.18 | 1.5 | SO   |
| SVM | rbf             | 0.10  | 0.00 | 0.67 | 0.18 | 0.75 | 0.24 | 0.62 | 0.26 | 0.64 | 0.22 | 1.6 | SO   |
| SVM | rbf             | 1.00  | 0.00 | 0.72 | 0.15 | 0.75 | 0.21 | 0.75 | 0.20 | 0.72 | 0.17 | 1.6 | SO   |
| SVM | rbf             | 10.00 | 0.00 | 0.72 | 0.15 | 0.75 | 0.23 | 0.77 | 0.21 | 0.73 | 0.19 | 1.6 | SO   |
| SVM | sigmoid         | 0.10  | 0.00 | 0.69 | 0.17 | 0.78 | 0.26 | 0.61 | 0.29 | 0.64 | 0.24 | 1.5 | SO   |
| SVM | sigmoid         | 1.00  | 0.00 | 0.69 | 0.16 | 0.81 | 0.21 | 0.64 | 0.26 | 0.66 | 0.20 | 1.5 | SO   |
| SVM | sigmoid         | 10.00 | 0.00 | 0.72 | 0.14 | 0.72 | 0.19 | 0.80 | 0.19 | 0.74 | 0.16 | 1.5 | SO   |
| SVM | linear          | 0.10  | 0.00 | 0.74 | 0.15 | 0.77 | 0.24 | 0.75 | 0.20 | 0.74 | 0.19 | 0.3 | IS   |
| SVM | linear          | 1.00  | 0.00 | 0.68 | 0.18 | 0.73 | 0.23 | 0.71 | 0.23 | 0.68 | 0.19 | 0.3 | IS   |
| SVM | linear          | 10.00 | 0.00 | 0.68 | 0.18 | 0.73 | 0.23 | 0.71 | 0.23 | 0.68 | 0.19 | 0.3 | IS   |
| SVM | poly            | 0.10  | 0.00 | 0.68 | 0.19 | 0.73 | 0.24 | 0.75 | 0.21 | 0.70 | 0.19 | 0.3 | IS   |
| SVM | poly            | 1.00  | 0.00 | 0.74 | 0.16 | 0.78 | 0.23 | 0.73 | 0.21 | 0.73 | 0.19 | 0.3 | IS   |
| SVM | poly            | 10.00 | 0.00 | 0.68 | 0.14 | 0.72 | 0.21 | 0.72 | 0.21 | 0.68 | 0.16 | 0.3 | IS   |
| SVM | rbf             | 0.10  | 0.00 | 0.53 | 0.18 | 0.53 | 0.20 | 0.95 | 0.21 | 0.66 | 0.20 | 0.4 | IS   |
| SVM | rbf             | 1.00  | 0.00 | 0.71 | 0.18 | 0.73 | 0.22 | 0.78 | 0.19 | 0.73 | 0.19 | 0.4 | IS   |
| SVM | rbf             | 10.00 | 0.00 | 0.72 | 0.16 | 0.75 | 0.24 | 0.73 | 0.21 | 0.71 | 0.20 | 0.4 | IS   |
| SVM | sigmoid         | 0.10  | 0.00 | 0.53 | 0.18 | 0.53 | 0.20 | 0.95 | 0.21 | 0.66 | 0.20 | 0.3 | IS   |
| SVM | sigmoid         | 1.00  | 0.00 | 0.53 | 0.18 | 0.53 | 0.20 | 0.95 | 0.21 | 0.66 | 0.20 | 0.3 | IS   |
| SVM | sigmoid         | 10.00 | 0.00 | 0.70 | 0.17 | 0.71 | 0.21 | 0.82 | 0.17 | 0.74 | 0.17 | 0.3 | IS   |
| SVM | linear          | 0.10  | 0.00 | 0.75 | 0.14 | 0.78 | 0.23 | 0.74 | 0.20 | 0.74 | 0.18 | 1.5 | ISO  |
| SVM | linear          | 1.00  | 0.00 | 0.68 | 0.18 | 0.73 | 0.23 | 0.71 | 0.23 | 0.68 | 0.19 | 1.5 | ISO  |
| SVM | linear          | 10.00 | 0.00 | 0.68 | 0.18 | 0.73 | 0.23 | 0.71 | 0.23 | 0.68 | 0.19 | 1.5 | ISO  |

|     |         |       |      |      |      |      |      |      |      |      |      |     |     |
|-----|---------|-------|------|------|------|------|------|------|------|------|------|-----|-----|
| SVM | poly    | 0.10  | 0.00 | 0.73 | 0.17 | 0.78 | 0.23 | 0.68 | 0.23 | 0.71 | 0.20 | 1.5 | ISO |
| SVM | poly    | 1.00  | 0.00 | 0.75 | 0.15 | 0.79 | 0.23 | 0.73 | 0.20 | 0.74 | 0.19 | 1.5 | ISO |
| SVM | poly    | 10.00 | 0.00 | 0.67 | 0.15 | 0.71 | 0.22 | 0.70 | 0.23 | 0.68 | 0.19 | 1.5 | ISO |
| SVM | rbf     | 0.10  | 0.00 | 0.72 | 0.16 | 0.75 | 0.20 | 0.74 | 0.21 | 0.72 | 0.18 | 1.5 | ISO |
| SVM | rbf     | 1.00  | 0.00 | 0.74 | 0.16 | 0.76 | 0.20 | 0.77 | 0.20 | 0.74 | 0.18 | 1.5 | ISO |
| SVM | rbf     | 10.00 | 0.00 | 0.72 | 0.16 | 0.75 | 0.24 | 0.74 | 0.21 | 0.72 | 0.20 | 1.5 | ISO |
| SVM | sigmoid | 0.10  | 0.00 | 0.72 | 0.14 | 0.73 | 0.21 | 0.74 | 0.24 | 0.71 | 0.20 | 1.6 | ISO |
| SVM | sigmoid | 1.00  | 0.00 | 0.72 | 0.14 | 0.73 | 0.21 | 0.74 | 0.24 | 0.71 | 0.20 | 1.5 | ISO |
| SVM | sigmoid | 10.00 | 0.00 | 0.74 | 0.15 | 0.74 | 0.20 | 0.81 | 0.18 | 0.76 | 0.17 | 1.5 | ISO |
| SVM | linear  | 0.10  | 0.00 | 0.51 | 0.17 | 0.54 | 0.28 | 0.69 | 0.41 | 0.52 | 0.27 | 0.3 | SR  |
| SVM | linear  | 1.00  | 0.00 | 0.51 | 0.17 | 0.54 | 0.28 | 0.70 | 0.41 | 0.53 | 0.27 | 0.3 | SR  |
| SVM | linear  | 10.00 | 0.00 | 0.52 | 0.18 | 0.54 | 0.27 | 0.72 | 0.40 | 0.54 | 0.27 | 0.3 | SR  |
| SVM | poly    | 0.10  | 0.00 | 0.45 | 0.15 | 0.48 | 0.27 | 0.78 | 0.40 | 0.52 | 0.27 | 0.3 | SR  |
| SVM | poly    | 1.00  | 0.00 | 0.45 | 0.15 | 0.48 | 0.27 | 0.77 | 0.40 | 0.52 | 0.27 | 0.3 | SR  |
| SVM | poly    | 10.00 | 0.00 | 0.45 | 0.15 | 0.48 | 0.27 | 0.77 | 0.40 | 0.52 | 0.27 | 0.3 | SR  |
| SVM | rbf     | 0.10  | 0.00 | 0.50 | 0.17 | 0.54 | 0.21 | 0.91 | 0.27 | 0.63 | 0.21 | 0.3 | SR  |
| SVM | rbf     | 1.00  | 0.00 | 0.45 | 0.15 | 0.48 | 0.27 | 0.78 | 0.40 | 0.52 | 0.27 | 0.3 | SR  |
| SVM | rbf     | 10.00 | 0.00 | 0.45 | 0.15 | 0.48 | 0.27 | 0.78 | 0.40 | 0.52 | 0.27 | 0.3 | SR  |
| SVM | sigmoid | 0.10  | 0.00 | 0.50 | 0.17 | 0.54 | 0.21 | 0.91 | 0.27 | 0.63 | 0.21 | 0.3 | SR  |
| SVM | sigmoid | 1.00  | 0.00 | 0.45 | 0.15 | 0.48 | 0.27 | 0.78 | 0.40 | 0.52 | 0.27 | 0.3 | SR  |
| SVM | sigmoid | 10.00 | 0.00 | 0.45 | 0.15 | 0.48 | 0.27 | 0.77 | 0.40 | 0.52 | 0.27 | 0.3 | SR  |
| SVM | linear  | 0.10  | 0.00 | 0.59 | 0.17 | 0.62 | 0.34 | 0.52 | 0.39 | 0.50 | 0.30 | 1.4 | SRO |
| SVM | linear  | 1.00  | 0.00 | 0.60 | 0.16 | 0.64 | 0.33 | 0.54 | 0.38 | 0.51 | 0.29 | 1.4 | SRO |
| SVM | linear  | 10.00 | 0.00 | 0.60 | 0.16 | 0.64 | 0.33 | 0.54 | 0.38 | 0.51 | 0.29 | 1.4 | SRO |
| SVM | poly    | 0.10  | 0.00 | 0.51 | 0.16 | 0.46 | 0.50 | 0.11 | 0.14 | 0.18 | 0.21 | 1.4 | SRO |
| SVM | poly    | 1.00  | 0.00 | 0.51 | 0.16 | 0.46 | 0.50 | 0.11 | 0.13 | 0.17 | 0.20 | 1.4 | SRO |
| SVM | poly    | 10.00 | 0.00 | 0.51 | 0.16 | 0.44 | 0.49 | 0.13 | 0.19 | 0.18 | 0.22 | 1.4 | SRO |
| SVM | rbf     | 0.10  | 0.00 | 0.51 | 0.16 | 0.44 | 0.49 | 0.14 | 0.22 | 0.19 | 0.23 | 1.5 | SRO |
| SVM | rbf     | 1.00  | 0.00 | 0.51 | 0.16 | 0.44 | 0.49 | 0.14 | 0.22 | 0.19 | 0.23 | 1.5 | SRO |
| SVM | rbf     | 10.00 | 0.00 | 0.50 | 0.16 | 0.45 | 0.48 | 0.16 | 0.25 | 0.20 | 0.23 | 1.4 | SRO |
| SVM | sigmoid | 0.10  | 0.00 | 0.51 | 0.16 | 0.46 | 0.50 | 0.11 | 0.14 | 0.18 | 0.21 | 1.4 | SRO |
| SVM | sigmoid | 1.00  | 0.00 | 0.51 | 0.16 | 0.46 | 0.50 | 0.11 | 0.14 | 0.18 | 0.21 | 1.5 | SRO |
| SVM | sigmoid | 10.00 | 0.00 | 0.50 | 0.16 | 0.45 | 0.48 | 0.16 | 0.25 | 0.20 | 0.23 | 1.4 | SRO |
| SVM | linear  | 0.10  | 0.00 | 0.74 | 0.15 | 0.77 | 0.24 | 0.75 | 0.20 | 0.74 | 0.19 | 0.3 | ISR |
| SVM | linear  | 1.00  | 0.00 | 0.68 | 0.18 | 0.73 | 0.23 | 0.71 | 0.23 | 0.68 | 0.19 | 0.3 | ISR |
| SVM | linear  | 10.00 | 0.00 | 0.68 | 0.18 | 0.73 | 0.23 | 0.71 | 0.23 | 0.68 | 0.19 | 0.3 | ISR |
| SVM | poly    | 0.10  | 0.00 | 0.44 | 0.14 | 0.52 | 0.30 | 0.73 | 0.41 | 0.50 | 0.26 | 0.3 | ISR |
| SVM | poly    | 1.00  | 0.00 | 0.54 | 0.18 | 0.56 | 0.19 | 0.89 | 0.19 | 0.66 | 0.18 | 0.3 | ISR |
| SVM | poly    | 10.00 | 0.00 | 0.61 | 0.17 | 0.61 | 0.18 | 0.91 | 0.13 | 0.71 | 0.16 | 0.3 | ISR |
| SVM | rbf     | 0.10  | 0.00 | 0.53 | 0.18 | 0.53 | 0.20 | 0.95 | 0.21 | 0.66 | 0.20 | 0.3 | ISR |
| SVM | rbf     | 1.00  | 0.00 | 0.70 | 0.17 | 0.73 | 0.23 | 0.75 | 0.20 | 0.71 | 0.19 | 0.3 | ISR |

|     |         |       |      |      |      |      |      |      |      |      |      |      |      |
|-----|---------|-------|------|------|------|------|------|------|------|------|------|------|------|
| SVM | rbf     | 10.00 | 0.00 | 0.70 | 0.15 | 0.72 | 0.21 | 0.75 | 0.19 | 0.71 | 0.17 | 0.3  | ISR  |
| SVM | sigmoid | 0.10  | 0.00 | 0.53 | 0.18 | 0.54 | 0.19 | 0.95 | 0.19 | 0.66 | 0.19 | 0.3  | ISR  |
| SVM | sigmoid | 1.00  | 0.00 | 0.73 | 0.16 | 0.75 | 0.21 | 0.79 | 0.19 | 0.75 | 0.18 | 0.3  | ISR  |
| SVM | sigmoid | 10.00 | 0.00 | 0.73 | 0.15 | 0.77 | 0.24 | 0.76 | 0.20 | 0.74 | 0.19 | 0.3  | ISR  |
| SVM | linear  | 0.10  | 0.00 | 0.75 | 0.14 | 0.78 | 0.23 | 0.74 | 0.20 | 0.74 | 0.18 | 1.4  | ISRO |
| SVM | linear  | 1.00  | 0.00 | 0.68 | 0.18 | 0.73 | 0.23 | 0.71 | 0.23 | 0.68 | 0.19 | 1.4  | ISRO |
| SVM | linear  | 10.00 | 0.00 | 0.68 | 0.18 | 0.73 | 0.23 | 0.71 | 0.23 | 0.68 | 0.19 | 1.5  | ISRO |
| SVM | poly    | 0.10  | 0.00 | 0.51 | 0.16 | 0.46 | 0.50 | 0.11 | 0.14 | 0.18 | 0.21 | 1.5  | ISRO |
| SVM | poly    | 1.00  | 0.00 | 0.63 | 0.14 | 0.63 | 0.21 | 0.80 | 0.23 | 0.67 | 0.19 | 1.4  | ISRO |
| SVM | poly    | 10.00 | 0.00 | 0.68 | 0.14 | 0.66 | 0.18 | 0.86 | 0.17 | 0.73 | 0.16 | 1.4  | ISRO |
| SVM | rbf     | 0.10  | 0.00 | 0.71 | 0.16 | 0.73 | 0.20 | 0.77 | 0.20 | 0.72 | 0.17 | 1.4  | ISRO |
| SVM | rbf     | 1.00  | 0.00 | 0.72 | 0.15 | 0.75 | 0.21 | 0.76 | 0.19 | 0.73 | 0.17 | 1.4  | ISRO |
| SVM | rbf     | 10.00 | 0.00 | 0.69 | 0.16 | 0.71 | 0.22 | 0.77 | 0.19 | 0.71 | 0.18 | 1.4  | ISRO |
| SVM | sigmoid | 0.10  | 0.00 | 0.73 | 0.16 | 0.76 | 0.20 | 0.75 | 0.21 | 0.73 | 0.18 | 1.5  | ISRO |
| SVM | sigmoid | 1.00  | 0.00 | 0.76 | 0.15 | 0.77 | 0.20 | 0.79 | 0.19 | 0.77 | 0.17 | 1.4  | ISRO |
| SVM | sigmoid | 10.00 | 0.00 | 0.73 | 0.17 | 0.78 | 0.25 | 0.76 | 0.20 | 0.75 | 0.19 | 1.4  | ISRO |
| RF  | 50.00   | 3.00  | 0.00 | 0.70 | 0.16 | 0.74 | 0.22 | 0.78 | 0.20 | 0.73 | 0.17 | 3.0  | S    |
| RF  | 50.00   | 6.00  | 0.00 | 0.70 | 0.17 | 0.73 | 0.21 | 0.78 | 0.20 | 0.72 | 0.17 | 3.0  | S    |
| RF  | 100.00  | 3.00  | 0.00 | 0.69 | 0.17 | 0.73 | 0.22 | 0.78 | 0.20 | 0.72 | 0.18 | 5.7  | S    |
| RF  | 100.00  | 6.00  | 0.00 | 0.70 | 0.17 | 0.73 | 0.22 | 0.78 | 0.19 | 0.72 | 0.17 | 5.7  | S    |
| RF  | 200.00  | 3.00  | 0.00 | 0.71 | 0.17 | 0.73 | 0.21 | 0.80 | 0.20 | 0.73 | 0.18 | 11.1 | S    |
| RF  | 200.00  | 6.00  | 0.00 | 0.70 | 0.17 | 0.72 | 0.21 | 0.80 | 0.20 | 0.73 | 0.18 | 11.1 | S    |
| RF  | 50.00   | 3.00  | 0.00 | 0.73 | 0.17 | 0.77 | 0.22 | 0.76 | 0.20 | 0.73 | 0.18 | 4.3  | SO   |
| RF  | 50.00   | 6.00  | 0.00 | 0.72 | 0.16 | 0.77 | 0.21 | 0.76 | 0.21 | 0.73 | 0.17 | 4.2  | SO   |
| RF  | 100.00  | 3.00  | 0.00 | 0.70 | 0.18 | 0.73 | 0.23 | 0.76 | 0.21 | 0.71 | 0.19 | 7.2  | SO   |
| RF  | 100.00  | 6.00  | 0.00 | 0.70 | 0.17 | 0.73 | 0.22 | 0.77 | 0.21 | 0.72 | 0.19 | 7.1  | SO   |
| RF  | 200.00  | 3.00  | 0.00 | 0.70 | 0.18 | 0.74 | 0.23 | 0.77 | 0.21 | 0.72 | 0.19 | 12.5 | SO   |
| RF  | 200.00  | 6.00  | 0.00 | 0.70 | 0.17 | 0.73 | 0.22 | 0.77 | 0.21 | 0.72 | 0.19 | 12.7 | SO   |
| RF  | 50.00   | 3.00  | 0.00 | 0.68 | 0.17 | 0.70 | 0.23 | 0.78 | 0.20 | 0.71 | 0.18 | 3.1  | IS   |
| RF  | 50.00   | 6.00  | 0.00 | 0.68 | 0.17 | 0.71 | 0.23 | 0.77 | 0.19 | 0.71 | 0.17 | 3.1  | IS   |
| RF  | 100.00  | 3.00  | 0.00 | 0.69 | 0.18 | 0.71 | 0.22 | 0.80 | 0.18 | 0.72 | 0.18 | 5.9  | IS   |
| RF  | 100.00  | 6.00  | 0.00 | 0.70 | 0.17 | 0.72 | 0.22 | 0.80 | 0.18 | 0.73 | 0.18 | 5.8  | IS   |
| RF  | 200.00  | 3.00  | 0.00 | 0.70 | 0.15 | 0.72 | 0.21 | 0.80 | 0.20 | 0.73 | 0.18 | 11.5 | IS   |
| RF  | 200.00  | 6.00  | 0.00 | 0.71 | 0.15 | 0.73 | 0.21 | 0.80 | 0.20 | 0.73 | 0.17 | 11.4 | IS   |
| RF  | 50.00   | 3.00  | 0.00 | 0.73 | 0.17 | 0.76 | 0.20 | 0.79 | 0.19 | 0.75 | 0.16 | 4.4  | ISO  |
| RF  | 50.00   | 6.00  | 0.00 | 0.74 | 0.17 | 0.77 | 0.21 | 0.79 | 0.19 | 0.75 | 0.17 | 4.3  | ISO  |
| RF  | 100.00  | 3.00  | 0.00 | 0.72 | 0.16 | 0.74 | 0.20 | 0.79 | 0.20 | 0.74 | 0.17 | 7.1  | ISO  |
| RF  | 100.00  | 6.00  | 0.00 | 0.72 | 0.15 | 0.75 | 0.21 | 0.78 | 0.19 | 0.74 | 0.17 | 7.2  | ISO  |
| RF  | 200.00  | 3.00  | 0.00 | 0.73 | 0.15 | 0.75 | 0.22 | 0.78 | 0.20 | 0.74 | 0.17 | 12.9 | ISO  |
| RF  | 200.00  | 6.00  | 0.00 | 0.72 | 0.16 | 0.75 | 0.23 | 0.77 | 0.20 | 0.73 | 0.18 | 12.9 | ISO  |
| RF  | 50.00   | 3.00  | 0.00 | 0.55 | 0.16 | 0.61 | 0.20 | 0.70 | 0.22 | 0.61 | 0.16 | 2.9  | SR   |

|     |        |       |      |      |      |      |      |      |      |      |      |      |      |
|-----|--------|-------|------|------|------|------|------|------|------|------|------|------|------|
| RF  | 50.00  | 6.00  | 0.00 | 0.53 | 0.15 | 0.62 | 0.20 | 0.67 | 0.25 | 0.59 | 0.16 | 2.8  | SR   |
| RF  | 100.00 | 3.00  | 0.00 | 0.54 | 0.16 | 0.60 | 0.19 | 0.72 | 0.23 | 0.61 | 0.15 | 5.4  | SR   |
| RF  | 100.00 | 6.00  | 0.00 | 0.54 | 0.15 | 0.61 | 0.19 | 0.67 | 0.23 | 0.59 | 0.15 | 5.5  | SR   |
| RF  | 200.00 | 3.00  | 0.00 | 0.53 | 0.16 | 0.59 | 0.20 | 0.69 | 0.23 | 0.59 | 0.17 | 10.7 | SR   |
| RF  | 200.00 | 6.00  | 0.00 | 0.53 | 0.15 | 0.59 | 0.20 | 0.66 | 0.23 | 0.58 | 0.16 | 10.7 | SR   |
| RF  | 50.00  | 3.00  | 0.00 | 0.57 | 0.13 | 0.63 | 0.21 | 0.64 | 0.23 | 0.59 | 0.16 | 4.1  | SRO  |
| RF  | 50.00  | 6.00  | 0.00 | 0.55 | 0.14 | 0.63 | 0.21 | 0.62 | 0.25 | 0.57 | 0.16 | 4.1  | SRO  |
| RF  | 100.00 | 3.00  | 0.00 | 0.55 | 0.13 | 0.61 | 0.20 | 0.63 | 0.23 | 0.58 | 0.15 | 6.7  | SRO  |
| RF  | 100.00 | 6.00  | 0.00 | 0.52 | 0.11 | 0.59 | 0.20 | 0.61 | 0.23 | 0.56 | 0.14 | 6.7  | SRO  |
| RF  | 200.00 | 3.00  | 0.00 | 0.57 | 0.14 | 0.62 | 0.19 | 0.66 | 0.23 | 0.60 | 0.16 | 11.9 | SRO  |
| RF  | 200.00 | 6.00  | 0.00 | 0.54 | 0.14 | 0.59 | 0.19 | 0.64 | 0.23 | 0.58 | 0.16 | 12.0 | SRO  |
| RF  | 50.00  | 3.00  | 0.00 | 0.58 | 0.20 | 0.63 | 0.23 | 0.79 | 0.21 | 0.65 | 0.18 | 2.9  | ISR  |
| RF  | 50.00  | 6.00  | 0.00 | 0.56 | 0.17 | 0.63 | 0.23 | 0.71 | 0.21 | 0.62 | 0.16 | 2.9  | ISR  |
| RF  | 100.00 | 3.00  | 0.00 | 0.57 | 0.16 | 0.64 | 0.22 | 0.77 | 0.21 | 0.64 | 0.15 | 5.4  | ISR  |
| RF  | 100.00 | 6.00  | 0.00 | 0.58 | 0.15 | 0.66 | 0.24 | 0.74 | 0.23 | 0.64 | 0.16 | 5.5  | ISR  |
| RF  | 200.00 | 3.00  | 0.00 | 0.57 | 0.18 | 0.63 | 0.22 | 0.79 | 0.21 | 0.65 | 0.17 | 10.6 | ISR  |
| RF  | 200.00 | 6.00  | 0.00 | 0.59 | 0.18 | 0.64 | 0.23 | 0.78 | 0.21 | 0.66 | 0.17 | 10.7 | ISR  |
| RF  | 50.00  | 3.00  | 0.00 | 0.58 | 0.15 | 0.65 | 0.23 | 0.68 | 0.21 | 0.62 | 0.17 | 4.0  | ISRO |
| RF  | 50.00  | 6.00  | 0.00 | 0.57 | 0.16 | 0.65 | 0.24 | 0.63 | 0.23 | 0.59 | 0.17 | 4.1  | ISRO |
| RF  | 100.00 | 3.00  | 0.00 | 0.61 | 0.16 | 0.66 | 0.22 | 0.72 | 0.20 | 0.65 | 0.16 | 6.6  | ISRO |
| RF  | 100.00 | 6.00  | 0.00 | 0.62 | 0.18 | 0.66 | 0.25 | 0.70 | 0.23 | 0.64 | 0.20 | 6.6  | ISRO |
| RF  | 200.00 | 3.00  | 0.00 | 0.63 | 0.15 | 0.67 | 0.21 | 0.74 | 0.21 | 0.66 | 0.16 | 11.9 | ISRO |
| RF  | 200.00 | 6.00  | 0.00 | 0.62 | 0.16 | 0.66 | 0.22 | 0.72 | 0.22 | 0.65 | 0.17 | 11.9 | ISRO |
| GBT | 3.00   | 0.10  | 0.00 | 0.74 | 0.14 | 0.76 | 0.21 | 0.83 | 0.19 | 0.76 | 0.16 | 3.5  | S    |
| GBT | 3.00   | 1.00  | 0.00 | 0.73 | 0.16 | 0.75 | 0.22 | 0.80 | 0.22 | 0.74 | 0.19 | 1.8  | S    |
| GBT | 3.00   | 10.00 | 0.00 | 0.49 | 0.18 | 0.48 | 0.21 | 0.90 | 0.30 | 0.61 | 0.25 | 1.4  | S    |
| GBT | 6.00   | 0.10  | 0.00 | 0.75 | 0.15 | 0.77 | 0.21 | 0.83 | 0.18 | 0.77 | 0.16 | 3.9  | S    |
| GBT | 6.00   | 1.00  | 0.00 | 0.73 | 0.16 | 0.75 | 0.22 | 0.80 | 0.22 | 0.74 | 0.19 | 1.9  | S    |
| GBT | 6.00   | 10.00 | 0.00 | 0.49 | 0.18 | 0.48 | 0.21 | 0.90 | 0.30 | 0.61 | 0.25 | 1.3  | S    |
| GBT | 3.00   | 0.10  | 0.00 | 0.75 | 0.16 | 0.76 | 0.21 | 0.84 | 0.19 | 0.77 | 0.17 | 5.1  | SO   |
| GBT | 3.00   | 1.00  | 0.00 | 0.73 | 0.14 | 0.77 | 0.21 | 0.78 | 0.20 | 0.74 | 0.17 | 3.2  | SO   |
| GBT | 3.00   | 10.00 | 0.00 | 0.44 | 0.17 | 0.00 | 0.00 | 0.00 | 0.00 | 0.00 | 0.00 | 2.6  | SO   |
| GBT | 6.00   | 0.10  | 0.00 | 0.76 | 0.16 | 0.77 | 0.21 | 0.84 | 0.19 | 0.77 | 0.18 | 5.6  | SO   |
| GBT | 6.00   | 1.00  | 0.00 | 0.73 | 0.14 | 0.77 | 0.21 | 0.78 | 0.20 | 0.74 | 0.17 | 3.3  | SO   |
| GBT | 6.00   | 10.00 | 0.00 | 0.44 | 0.17 | 0.00 | 0.00 | 0.00 | 0.00 | 0.00 | 0.00 | 2.6  | SO   |
| GBT | 3.00   | 0.10  | 0.00 | 0.75 | 0.14 | 0.75 | 0.21 | 0.85 | 0.16 | 0.77 | 0.15 | 6.0  | IS   |
| GBT | 3.00   | 1.00  | 0.00 | 0.73 | 0.14 | 0.75 | 0.21 | 0.81 | 0.18 | 0.75 | 0.15 | 3.0  | IS   |
| GBT | 3.00   | 10.00 | 0.00 | 0.49 | 0.18 | 0.48 | 0.21 | 0.90 | 0.30 | 0.61 | 0.25 | 1.8  | IS   |
| GBT | 6.00   | 0.10  | 0.00 | 0.73 | 0.14 | 0.74 | 0.21 | 0.84 | 0.16 | 0.76 | 0.15 | 6.4  | IS   |
| GBT | 6.00   | 1.00  | 0.00 | 0.73 | 0.14 | 0.75 | 0.21 | 0.81 | 0.18 | 0.75 | 0.15 | 3.0  | IS   |
| GBT | 6.00   | 10.00 | 0.00 | 0.49 | 0.18 | 0.48 | 0.21 | 0.90 | 0.30 | 0.61 | 0.25 | 2.0  | IS   |

|     |       |       |      |      |      |      |      |      |      |      |      |       |      |
|-----|-------|-------|------|------|------|------|------|------|------|------|------|-------|------|
| GBT | 3.00  | 0.10  | 0.00 | 0.73 | 0.14 | 0.75 | 0.20 | 0.81 | 0.18 | 0.74 | 0.15 | 7.8   | ISO  |
| GBT | 3.00  | 1.00  | 0.00 | 0.71 | 0.15 | 0.74 | 0.22 | 0.77 | 0.19 | 0.73 | 0.17 | 4.3   | ISO  |
| GBT | 3.00  | 10.00 | 0.00 | 0.44 | 0.17 | 0.00 | 0.00 | 0.00 | 0.00 | 0.00 | 0.00 | 3.4   | ISO  |
| GBT | 6.00  | 0.10  | 0.00 | 0.73 | 0.14 | 0.75 | 0.21 | 0.81 | 0.18 | 0.75 | 0.16 | 8.7   | ISO  |
| GBT | 6.00  | 1.00  | 0.00 | 0.71 | 0.15 | 0.74 | 0.22 | 0.77 | 0.19 | 0.73 | 0.17 | 4.8   | ISO  |
| GBT | 6.00  | 10.00 | 0.00 | 0.44 | 0.17 | 0.00 | 0.00 | 0.00 | 0.00 | 0.00 | 0.00 | 3.3   | ISO  |
| GBT | 3.00  | 0.10  | 0.00 | 0.49 | 0.14 | 0.55 | 0.23 | 0.56 | 0.25 | 0.51 | 0.19 | 1.2   | SR   |
| GBT | 3.00  | 1.00  | 0.00 | 0.47 | 0.13 | 0.53 | 0.22 | 0.55 | 0.25 | 0.50 | 0.18 | 0.9   | SR   |
| GBT | 3.00  | 10.00 | 0.00 | 0.49 | 0.18 | 0.48 | 0.21 | 0.90 | 0.30 | 0.61 | 0.25 | 0.8   | SR   |
| GBT | 6.00  | 0.10  | 0.00 | 0.46 | 0.13 | 0.54 | 0.23 | 0.53 | 0.25 | 0.49 | 0.18 | 1.3   | SR   |
| GBT | 6.00  | 1.00  | 0.00 | 0.46 | 0.14 | 0.53 | 0.22 | 0.55 | 0.25 | 0.49 | 0.17 | 0.9   | SR   |
| GBT | 6.00  | 10.00 | 0.00 | 0.49 | 0.18 | 0.48 | 0.21 | 0.90 | 0.30 | 0.61 | 0.25 | 0.8   | SR   |
| GBT | 3.00  | 0.10  | 0.00 | 0.48 | 0.17 | 0.54 | 0.24 | 0.54 | 0.23 | 0.50 | 0.20 | 2.4   | SRO  |
| GBT | 3.00  | 1.00  | 0.00 | 0.49 | 0.16 | 0.55 | 0.23 | 0.53 | 0.26 | 0.50 | 0.19 | 2.1   | SRO  |
| GBT | 3.00  | 10.00 | 0.00 | 0.44 | 0.17 | 0.00 | 0.00 | 0.00 | 0.00 | 0.00 | 0.00 | 2.1   | SRO  |
| GBT | 6.00  | 0.10  | 0.00 | 0.46 | 0.15 | 0.54 | 0.23 | 0.52 | 0.23 | 0.49 | 0.17 | 2.5   | SRO  |
| GBT | 6.00  | 1.00  | 0.00 | 0.50 | 0.15 | 0.55 | 0.23 | 0.52 | 0.26 | 0.49 | 0.20 | 2.1   | SRO  |
| GBT | 6.00  | 10.00 | 0.00 | 0.44 | 0.17 | 0.00 | 0.00 | 0.00 | 0.00 | 0.00 | 0.00 | 2.0   | SRO  |
| GBT | 3.00  | 0.10  | 0.00 | 0.58 | 0.17 | 0.64 | 0.22 | 0.69 | 0.22 | 0.62 | 0.17 | 1.2   | ISR  |
| GBT | 3.00  | 1.00  | 0.00 | 0.58 | 0.18 | 0.63 | 0.22 | 0.69 | 0.23 | 0.62 | 0.18 | 0.9   | ISR  |
| GBT | 3.00  | 10.00 | 0.00 | 0.49 | 0.18 | 0.48 | 0.21 | 0.90 | 0.30 | 0.61 | 0.25 | 0.8   | ISR  |
| GBT | 6.00  | 0.10  | 0.00 | 0.56 | 0.16 | 0.63 | 0.21 | 0.67 | 0.22 | 0.61 | 0.16 | 1.3   | ISR  |
| GBT | 6.00  | 1.00  | 0.00 | 0.58 | 0.18 | 0.63 | 0.21 | 0.70 | 0.23 | 0.62 | 0.18 | 0.9   | ISR  |
| GBT | 6.00  | 10.00 | 0.00 | 0.49 | 0.18 | 0.48 | 0.21 | 0.90 | 0.30 | 0.61 | 0.25 | 0.8   | ISR  |
| GBT | 3.00  | 0.10  | 0.00 | 0.58 | 0.17 | 0.65 | 0.23 | 0.67 | 0.21 | 0.62 | 0.16 | 2.5   | ISRO |
| GBT | 3.00  | 1.00  | 0.00 | 0.58 | 0.17 | 0.63 | 0.21 | 0.66 | 0.23 | 0.61 | 0.18 | 2.1   | ISRO |
| GBT | 3.00  | 10.00 | 0.00 | 0.44 | 0.17 | 0.00 | 0.00 | 0.00 | 0.00 | 0.00 | 0.00 | 2.0   | ISRO |
| GBT | 6.00  | 0.10  | 0.00 | 0.58 | 0.19 | 0.65 | 0.24 | 0.67 | 0.21 | 0.62 | 0.18 | 2.5   | ISRO |
| GBT | 6.00  | 1.00  | 0.00 | 0.57 | 0.17 | 0.62 | 0.22 | 0.66 | 0.23 | 0.60 | 0.18 | 2.1   | ISRO |
| GBT | 6.00  | 10.00 | 0.00 | 0.44 | 0.17 | 0.00 | 0.00 | 0.00 | 0.00 | 0.00 | 0.00 | 2.0   | ISRO |
| PFN | 0.00  | 0.00  | 0.00 | 0.51 | 0.13 | 0.56 | 0.18 | 0.93 | 0.16 | 0.66 | 0.14 | 22.1  | SR   |
| PFN | 0.00  | 0.00  | 0.00 | 0.47 | 0.14 | 0.54 | 0.19 | 0.75 | 0.20 | 0.59 | 0.14 | 23.6  | SRO  |
| PFN | 0.00  | 0.00  | 0.00 | 0.52 | 0.17 | 0.56 | 0.18 | 0.92 | 0.20 | 0.66 | 0.16 | 22.5  | ISR  |
| PFN | 0.00  | 0.00  | 0.00 | 0.50 | 0.17 | 0.57 | 0.20 | 0.79 | 0.22 | 0.62 | 0.16 | 24.3  | ISRO |
| MLP | FALSE | 20.00 | 0.00 | 0.90 | 0.10 | 0.95 | 0.10 | 0.87 | 0.15 | 0.90 | 0.10 | 378.5 | S    |
| MLP | FALSE | 40.00 | 0.00 | 0.91 | 0.11 | 0.96 | 0.10 | 0.89 | 0.17 | 0.91 | 0.13 | 373.1 | S    |
| MLP | TRUE  | 20.00 | 0.00 | 0.89 | 0.10 | 0.94 | 0.11 | 0.88 | 0.15 | 0.90 | 0.10 | 384.5 | S    |
| MLP | TRUE  | 40.00 | 0.00 | 0.92 | 0.10 | 0.97 | 0.08 | 0.91 | 0.13 | 0.93 | 0.09 | 383.9 | S    |
| MLP | FALSE | 20.00 | 0.00 | 0.90 | 0.10 | 0.94 | 0.13 | 0.90 | 0.12 | 0.91 | 0.10 | 492.6 | SO   |
| MLP | FALSE | 40.00 | 0.00 | 0.91 | 0.11 | 0.94 | 0.13 | 0.91 | 0.12 | 0.92 | 0.10 | 383.6 | SO   |
| MLP | TRUE  | 20.00 | 0.00 | 0.91 | 0.10 | 0.94 | 0.12 | 0.91 | 0.12 | 0.92 | 0.10 | 394.8 | SO   |



|     |       |       |      |      |      |      |      |      |      |      |      |       |      |
|-----|-------|-------|------|------|------|------|------|------|------|------|------|-------|------|
| MLP | TRUE  | 40.00 | 0.00 | 0.92 | 0.08 | 0.94 | 0.11 | 0.93 | 0.11 | 0.93 | 0.08 | 390.3 | SO   |
| MLP | FALSE | 20.00 | 0.00 | 0.89 | 0.11 | 0.93 | 0.13 | 0.88 | 0.16 | 0.89 | 0.12 | 382.4 | IS   |
| MLP | FALSE | 40.00 | 0.00 | 0.90 | 0.11 | 0.93 | 0.13 | 0.92 | 0.12 | 0.91 | 0.10 | 382.5 | IS   |
| MLP | TRUE  | 20.00 | 0.00 | 0.90 | 0.09 | 0.94 | 0.10 | 0.89 | 0.14 | 0.91 | 0.09 | 381.0 | IS   |
| MLP | TRUE  | 40.00 | 0.00 | 0.92 | 0.09 | 0.94 | 0.11 | 0.93 | 0.12 | 0.93 | 0.09 | 389.5 | IS   |
| MLP | FALSE | 20.00 | 0.00 | 0.92 | 0.09 | 0.94 | 0.12 | 0.92 | 0.12 | 0.92 | 0.09 | 381.7 | ISO  |
| MLP | FALSE | 40.00 | 0.00 | 0.93 | 0.10 | 0.94 | 0.12 | 0.94 | 0.13 | 0.93 | 0.11 | 386.3 | ISO  |
| MLP | TRUE  | 20.00 | 0.00 | 0.93 | 0.08 | 0.94 | 0.11 | 0.94 | 0.11 | 0.93 | 0.08 | 389.5 | ISO  |
| MLP | TRUE  | 40.00 | 0.00 | 0.93 | 0.10 | 0.93 | 0.13 | 0.95 | 0.10 | 0.93 | 0.10 | 397.7 | ISO  |
| MLP | FALSE | 20.00 | 0.00 | 0.52 | 0.18 | 0.48 | 0.37 | 0.59 | 0.46 | 0.44 | 0.33 | 368.7 | SR   |
| MLP | FALSE | 40.00 | 0.00 | 0.51 | 0.18 | 0.49 | 0.36 | 0.56 | 0.45 | 0.43 | 0.31 | 369.2 | SR   |
| MLP | TRUE  | 20.00 | 0.00 | 0.49 | 0.17 | 0.51 | 0.34 | 0.62 | 0.44 | 0.46 | 0.29 | 851.6 | SR   |
| MLP | TRUE  | 40.00 | 0.00 | 0.49 | 0.15 | 0.52 | 0.37 | 0.56 | 0.45 | 0.43 | 0.30 | 385.5 | SR   |
| MLP | FALSE | 20.00 | 0.00 | 0.55 | 0.17 | 0.56 | 0.35 | 0.65 | 0.42 | 0.51 | 0.30 | 379.8 | SRO  |
| MLP | FALSE | 40.00 | 0.00 | 0.56 | 0.15 | 0.52 | 0.35 | 0.62 | 0.45 | 0.49 | 0.32 | 376.8 | SRO  |
| MLP | TRUE  | 20.00 | 0.00 | 0.55 | 0.18 | 0.48 | 0.38 | 0.51 | 0.45 | 0.42 | 0.34 | 376.8 | SRO  |
| MLP | TRUE  | 40.00 | 0.00 | 0.55 | 0.18 | 0.51 | 0.36 | 0.59 | 0.46 | 0.46 | 0.33 | 377.8 | SRO  |
| MLP | FALSE | 20.00 | 0.00 | 0.94 | 0.10 | 0.96 | 0.09 | 0.94 | 0.14 | 0.94 | 0.11 | 369.4 | ISR  |
| MLP | FALSE | 40.00 | 0.00 | 0.96 | 0.09 | 0.98 | 0.06 | 0.96 | 0.11 | 0.96 | 0.08 | 370.2 | ISR  |
| MLP | TRUE  | 20.00 | 0.00 | 0.95 | 0.11 | 0.96 | 0.10 | 0.96 | 0.13 | 0.95 | 0.11 | 376.8 | ISR  |
| MLP | TRUE  | 40.00 | 0.00 | 0.95 | 0.12 | 0.95 | 0.12 | 0.96 | 0.09 | 0.95 | 0.10 | 378.2 | ISR  |
| MLP | FALSE | 20.00 | 0.00 | 0.96 | 0.09 | 0.98 | 0.07 | 0.95 | 0.13 | 0.96 | 0.10 | 371.5 | ISRO |
| MLP | FALSE | 40.00 | 0.00 | 0.96 | 0.08 | 0.97 | 0.08 | 0.97 | 0.10 | 0.97 | 0.08 | 372.3 | ISRO |
| MLP | TRUE  | 20.00 | 0.00 | 0.95 | 0.11 | 0.96 | 0.11 | 0.95 | 0.12 | 0.95 | 0.11 | 379.2 | ISRO |
| MLP | TRUE  | 40.00 | 0.00 | 0.94 | 0.14 | 0.94 | 0.14 | 0.95 | 0.14 | 0.94 | 0.14 | 392.4 | ISRO |

**Figure S1.** Comparison of data processing treatments.

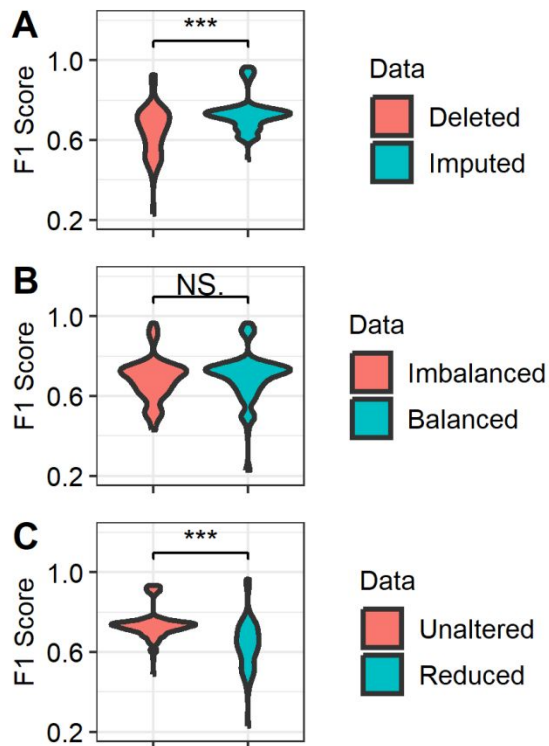

**Figure S2.** Comparison of models by F1 score over computation time.

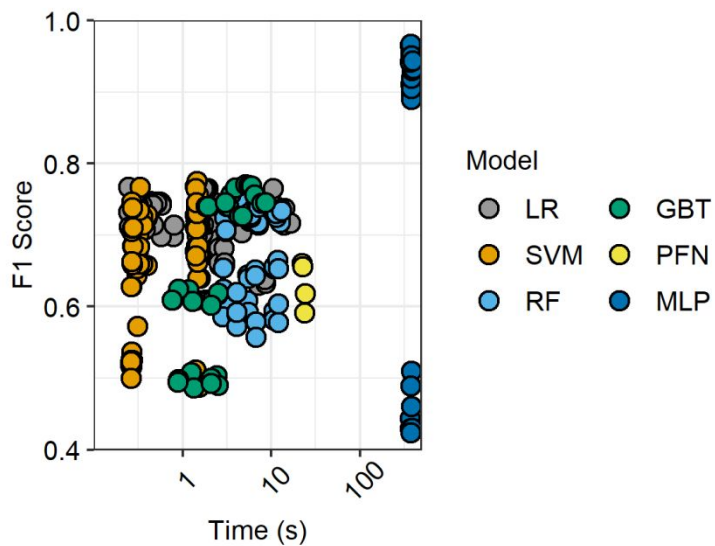

**Hardware:**

GPU: MSI GeForce GTX 980TI

CPU: AMD Ryzen 5 3600 3.60 GHz

RAM: 16.0 GB
